# Supplementary material for: Portable solid-state sensor for therapeutic monitoring of an antineoplastic drug; vinblastine in human plasma
Source: Royal Society of Chemistry journal article supplement (doi:10.1039/d0ra07070j), 2020-01-01
Supplement: d0ra07070j1.pdf [file d0ra07070j1.pdf]

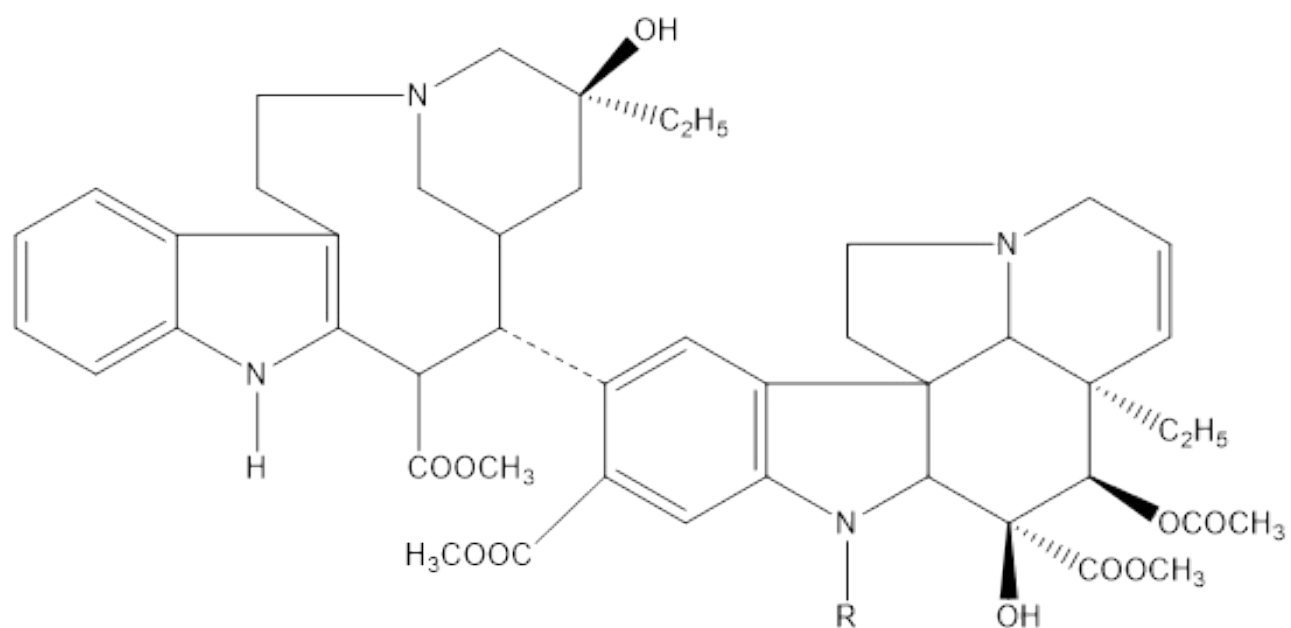

**Vinblastine: R = CH<sub>3</sub>**

**Vincristine: R = CHO**

**Supplementary Figure S1. Chemical structure of vinblastine and vincristine.**

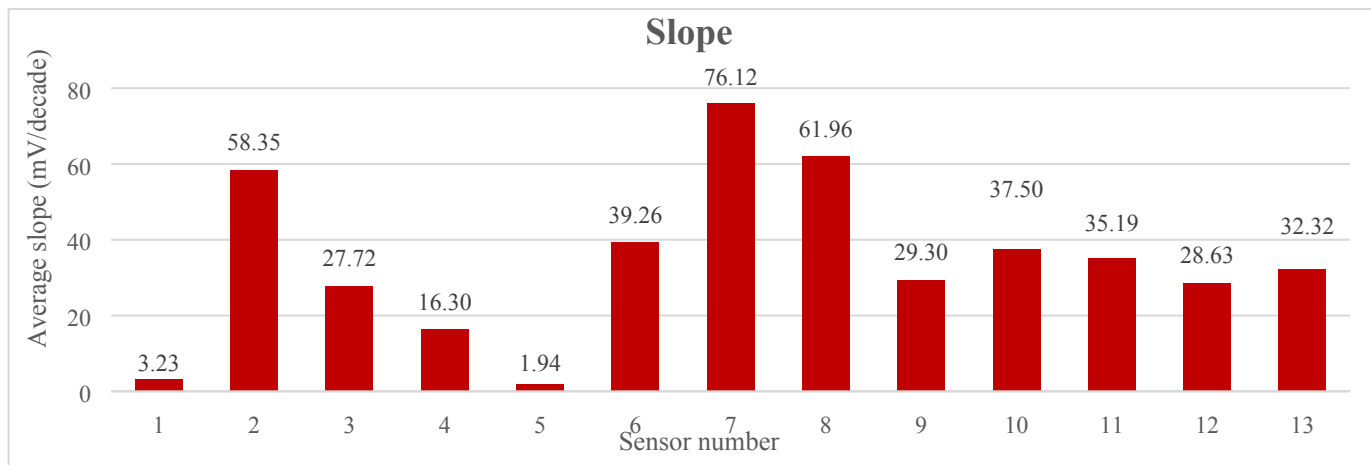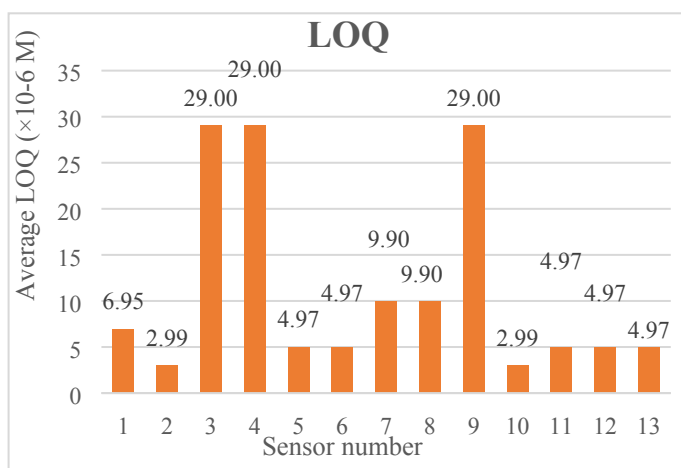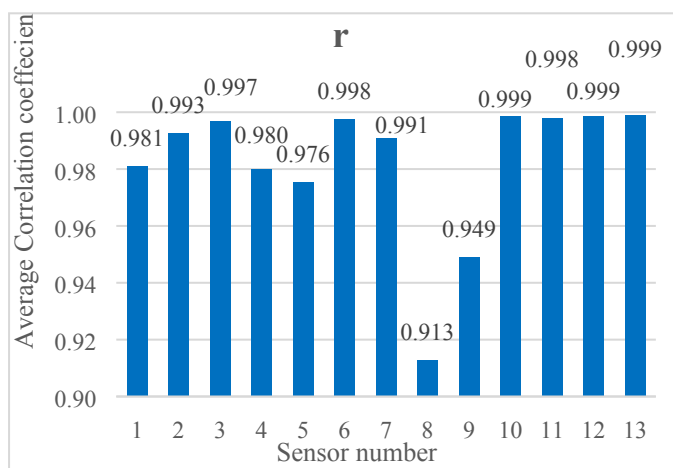

**Supplementary Figure S2.** The average response parameters—slope, LOQ, and correlation coefficient (R)—of the 13 studied sensors during the optimization study (n=3).

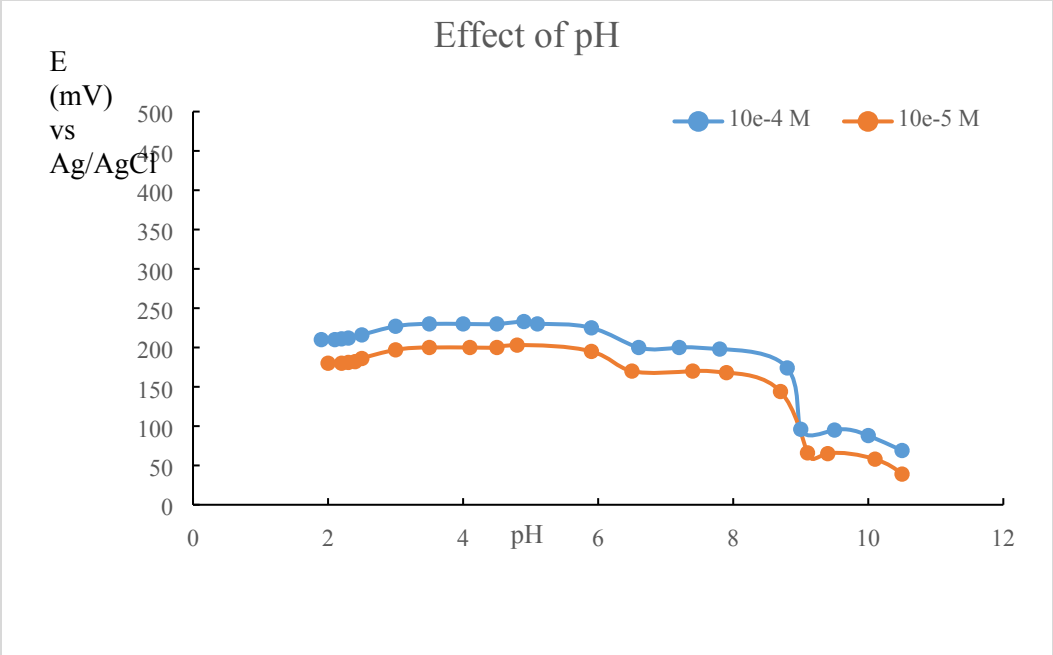

**Supplementary Figure S3.** Effect of pH on the potential response of the optimized sensor using  $1 \times 10^{-4}$  and  $1 \times 10^{-5}$  M vinblastine solutions.

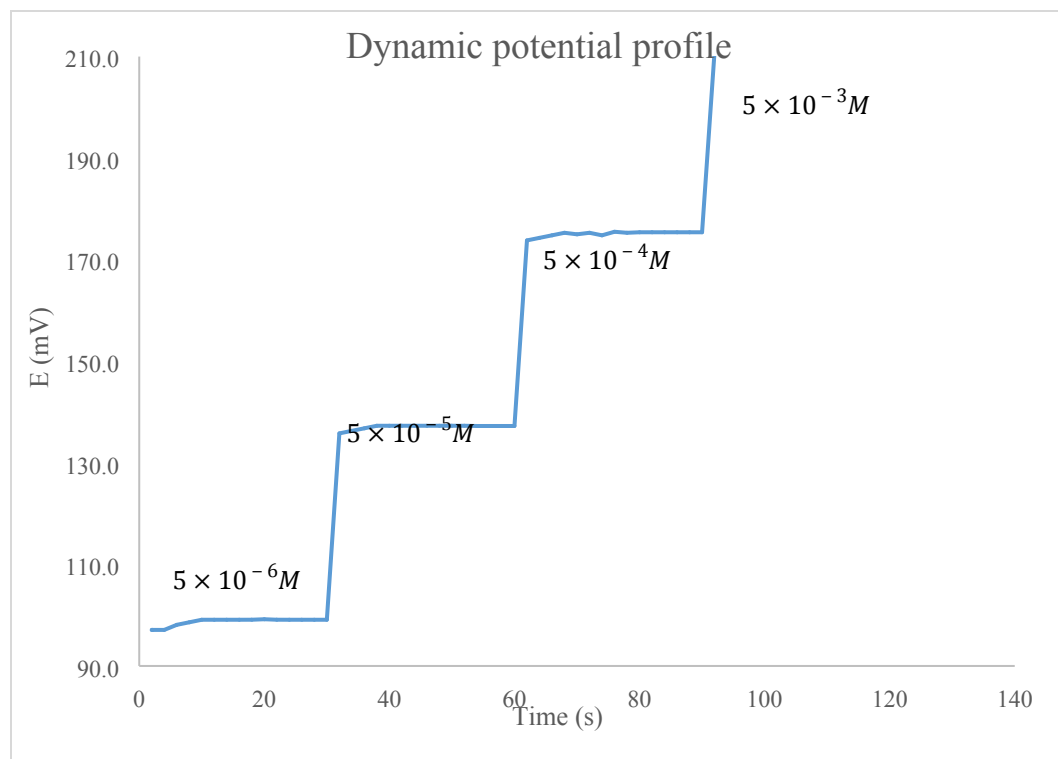

**Supplementary Figure S4.** Dynamic potential profile of the optimized sensor, the potential was recorded at two seconds sampling interval.

**Supplementary Table S1.** Composition of the studied sensors

| Sensor no.       | Sensor Composition (g% w/w) |               |              |             |               |              |              |
|------------------|-----------------------------|---------------|--------------|-------------|---------------|--------------|--------------|
|                  | PVC                         | Ion Exchanger |              | Plasticizer |               | Ionophore    |              |
|                  |                             | Type          | amount       | Type        | amount        | Type         | amount       |
| Sensor 1         | 33.0 %                      | PM            | 1.0 %        | NPOE        | 66.0 %        | —            | —            |
| Sensor 2         | 33.0 %                      | PT            | 1.0 %        | NPOE        | 66.0 %        | —            | —            |
| Sensor 3         | 33.0 %                      | TPB           | 1.0 %        | NPOE        | 66.0 %        | —            | —            |
| Sensor 4         | 33.0 %                      | RK            | 1.0 %        | NPOE        | 66.0 %        | —            | —            |
| Sensor 5         | 33.0 %                      | TKS           | 1.0 %        | NPOE        | 66.0 %        | —            | —            |
| Sensor 6         | 33.0 %                      | TPB           | 1.0 %        | DOP         | 66.0 %        | —            | —            |
| Sensor 7         | 33.0 %                      | TPB           | 1.0 %        | DBP         | 66.0 %        | —            | —            |
| Sensor 8         | 33.0 %                      | TPB           | 1.0 %        | DBS         | 66.0 %        | —            | —            |
| Sensor 9         | 33.0 %                      | TPB           | 1.0 %        | NPPE        | 66.0 %        | —            | —            |
| <b>Sensor 10</b> | <b>32.3 %</b>               | <b>TPB</b>    | <b>1.0 %</b> | <b>DOP</b>  | <b>64.7 %</b> | <b>HPBCD</b> | <b>2.0 %</b> |
| Sensor 11        | 32.3 %                      | TPB           | 1.0 %        | DOP         | 64.7 %        | BCD          | 2.0 %        |
| Sensor 12        | 32.3 %                      | TPB           | 1.0 %        | DOP         | 64.7 %        | CMBCD        | 2.0 %        |
| Sensor 13        | 32.3 %                      | TPB           | 1.0 %        | DOP         | 64.7 %        | CX8          | 2.0 %        |

Poly(vinyl)chloride (PVC), Phosphomolybdic acid (PM), phosphotungstic acid (PT), sodium tetraphenyl borate (TPB), ammonium reineckate (RK), potassium tetrakis (TKS), nitrophenyl octyl ether (NPOE), dioctyl phthalate (DOP), dibutyl phthalate (DBP), dibutyl sebacate (DBS), nitrophenyl phenyl ether (NPPE), hydroxypropyl- $\beta$ -cyclodextrin (HPBCD),  $\beta$ -cyclodextrin (BCD), carboxymethyl- $\beta$ -cyclodextrin (CMBCD), calix-[8]-arene (CX8).

**Supplementary Table S2.** The selectivity of the optimized sensor relative to cationic interfering species described as the potentiometric selectivity coefficient ( $K_{VB, int}^{pot}$ ).

| <b>Interfering Ion</b>       | $K_{VB, int}^{pot}$ * |
|------------------------------|-----------------------|
| Vincristine                  | $2.85 \times 10^{-2}$ |
| Na <sup>+</sup>              | $3.44 \times 10^{-3}$ |
| K <sup>+</sup>               | $3.23 \times 10^{-3}$ |
| Zn <sup>2+</sup>             | $3.23 \times 10^{-3}$ |
| Mn <sup>2+</sup>             | $2.87 \times 10^{-3}$ |
| Pb <sup>2+</sup>             | $3.65 \times 10^{-3}$ |
| Co <sup>2+</sup>             | $3.44 \times 10^{-3}$ |
| Mg <sup>2+</sup>             | $3.88 \times 10^{-3}$ |
| Cu <sup>2+</sup>             | $3.88 \times 10^{-3}$ |
| Fe <sup>2+</sup>             | $3.65 \times 10^{-3}$ |
| Ca <sup>2+</sup>             | $3.88 \times 10^{-3}$ |
| Ni <sup>2+</sup>             | $4.12 \times 10^{-3}$ |
| NH <sub>4</sub> <sup>+</sup> | $3.44 \times 10^{-3}$ |
| Ba <sup>2+</sup>             | $3.65 \times 10^{-3}$ |

\* Determined by the separate solution method using  $1 \times 10^{-4}$  M solutions.

**Supplementary Table S3.** Application of the developed method for the determination of VB in Cytoblastin® vial and spiked plasma samples.

| <b>Application</b>         | <b>Mean recovery ± %RSD*</b> | <b>Recovery of the standard added ± %RSD*</b> |
|----------------------------|------------------------------|-----------------------------------------------|
| <b>Cytoblastin® Vial**</b> | 99.45 ± 1.101                | 101.50 ± 1.370                                |
| <b>Plasma</b>              | 100.03 ± 3.508               | 98.36 ± 3.780                                 |

\* Average of five determinations

\*\* Cytoblastin® aqueous injection for intravenous use only containing vinblastine sulfate 10mg/10mL, batch number 140573.
